# Supplementary material
Source: PubMed Central journal article supplement (PMC5539839)
Supplement: jamapsychiatry-74-563-s001.pdf [file jamapsychiatry-74-563-s001.pdf]

## Supplementary Online Content

Miller IW, Camargo CA Jr, Arias SA, et al; ED-SAFE Investigators. Suicide prevention in an emergency department population: the ED-SAFE Study. *JAMA Psychiatry*. Published online April 29, 2017. doi:10.1001/jamapsychiatry.2017.0678

**eTable 1.** Timing of CLASP-ED telephone contacts

**eTable 2.** Cox proportional hazards model for the suicide attempts

**eTable 3.** Negative binomial regression model for suicide attempts as a count variable

**eTable 4.** Cox proportional hazards model for the suicide attempts including calendar month

**eTable 5.** Cox proportional hazards model for the effect of time on suicide attempts within each study phase

**eTable 6.** Cox proportional hazards model for the suicide composite

**eTable 7.** Negative binomial regression model for the suicide composite as a count variable

**eFigure.** Proportion of participants who remained suicide composite-free over time

This supplementary material has been provided by the authors to give readers additional information about their work.

**eTable 1.** Timing of CLASP-ED telephone contacts

| <b>Time</b>                                          | <b>Participant to be contacted</b> |
|------------------------------------------------------|------------------------------------|
| Week 1<br>(ASAP after discharge from<br>ED/hospital) | Patient                            |
| Week 2                                               | Patient                            |
| Week 3                                               | Significant<br>Other               |
| Weeks 4, 10, 22, 34 and 48                           | Patient                            |
| Weeks 8, 20 and 32                                   | Significant<br>Other               |

**eTable 2.** Cox proportional hazards model for the suicide attempts

| <b>Variables*</b>                                     | <b>Hazards ratio<br/>(95% CI)</b> | <b>P-value</b> |
|-------------------------------------------------------|-----------------------------------|----------------|
| <i>Study phases</i>                                   |                                   |                |
| Phase 1 (Treatment as Usual)                          | Reference                         | -              |
| Phase 2 (Universal Screening)                         | 0.90 (0.67-1.21)                  | 0.48           |
| Phase 3 (Universal Screening + Intervention)          | 0.73 (0.55-0.97)                  | 0.03           |
| <i>Covariates</i>                                     |                                   |                |
| Age categories (quartiles)                            |                                   |                |
| 18-25.9 years                                         | Reference                         | -              |
| 26-36.9 years                                         | 1.11 (0.78-1.59)                  | 0.55           |
| 37-46.9 years                                         | 1.01 (0.70-1.47)                  | 0.96           |
| ≥47 years                                             | 1.17 (0.78-1.74)                  | 0.45           |
| Female sex                                            | 1.06 (0.82-1.37)                  | 0.68           |
| Lives alone                                           | 0.91 (0.69-1.20)                  | 0.52           |
| Served in the military                                | 0.85 (0.50-1.42)                  | 0.53           |
| Coexisting medical disorder†                          | 0.96 (0.73-1.26)                  | 0.75           |
| Coexisting psychiatric disorder‡                      | 2.32 (1.28-4.22)                  | 0.01           |
| Lifetime history of suicide attempt                   | 1.29 (0.89-1.87)                  | 0.17           |
| Lifetime history of aborted attempt                   | 1.02 (0.79-1.32)                  | 0.89           |
| Lifetime history of interrupted attempt               | 1.13 (0.86-1.47)                  | 0.39           |
| Lifetime history of non-suicidal self-injury          | 1.35 (1.04-1.75)                  | 0.02           |
| Columbia Suicide Severity Rating Scale (linear term)§ | 1.34 (0.90-1.99)                  | 0.15           |

|                                                               |                  |        |
|---------------------------------------------------------------|------------------|--------|
| Columbia Suicide Severity Rating Scale (quadratic term)§      | 0.95 (0.87-1.02) | 0.16   |
| ED visit for psychiatric problems within the past 6-months    | 1.22 (0.89-1.67) | 0.23   |
| Hospitalization for psychiatric problems within past 6-months | 2.29 (1.65-3.17) | <0.001 |
| Suicide attempt in past week                                  | 1.36 (1.03-1.79) | 0.03   |
| Current alcohol misuse                                        | 1.38 (1.07-1.79) | 0.01   |
| Current drug use                                              | 0.98 (0.76-1.26) | 0.88   |
| Psychological distress (Global Severity Index score)¶         | 1.00 (0.98-1.02) | 1.00   |
| Quality of life (SF-6D score)¶                                | 0.98 (0.95-1.06) | 0.98   |

Abbreviation: CI, confidence interval; ED, emergency department

\* None of the indicator variables for the participating sites were statistically significant (all  $P > 0.05$ )

† Defined by heart disease, cancer, HIV infection, diabetes, stroke, or chronic pain.

‡ Defined by depression, bipolar disorder, anxiety disorder, or schizophrenia.

§ Quadratic term included in the model based on likelihood ratio test.  $\beta$ -coefficient for the linear term, 0.30;  $\beta$ -coefficient for the quadratic term, -0.06.

¶ Hazard ratio for a one-unit increase in the corresponding scale.

**eTable 3.** Negative binomial regression model for suicide attempts as a count variable

| <b>Variables*</b>                            | <b>Risk ratio<br/>(95% CI)</b> | <b>P-value</b> |
|----------------------------------------------|--------------------------------|----------------|
| <i>Study phases</i>                          |                                |                |
| Phase 1 (Treatment as Usual)                 | Reference                      | -              |
| Phase 2 (Screening Only)                     | 0.93 (0.70-1.23)               | 0.61           |
| Phase 3 (Intervention)                       | 0.75 (0.57-0.98)               | 0.04           |
| <i>Covariates</i>                            |                                |                |
| <i>Age categories (quartiles)</i>            |                                |                |
| 18-25.9 years                                | Reference                      | -              |
| 26-36.9 years                                | 1.19 (0.85-1.68)               | 0.31           |
| 37-46.9 years                                | 1.01 (0.70-1.45)               | 0.97           |
| ≥47 years                                    | 1.24 (0.85-1.81)               | 0.27           |
| Female sex                                   | 1.07 (0.83-1.38)               | 0.58           |
| Lives alone                                  | 0.92 (0.71-1.20)               | 0.55           |
| Served in the military                       | 0.79 (0.48-1.32)               | 0.37           |
| Coexisting medical disorder <sup>†</sup>     | 0.97 (0.75-1.27)               | 0.85           |
| Coexisting psychiatric disorder <sup>‡</sup> | 2.31 (1.30-4.10)               | 0.004          |
| Lifetime history of suicide attempt          | 1.25 (0.87-1.79)               | 0.23           |
| Lifetime history of aborted attempt          | 1.05 (0.81-1.35)               | 0.72           |

|                                                               |                  |        |
|---------------------------------------------------------------|------------------|--------|
| Lifetime history of interrupted attempt                       | 1.06 (0.81-1.37) | 0.68   |
| Lifetime history of non-suicidal self-injury                  | 1.35 (1.05-1.74) | 0.02   |
| Columbia Suicide Severity Rating Scale (linear term)§         | 1.25 (0.86-1.84) | 0.24   |
| Columbia Suicide Severity Rating Scale (quadratic term)§      | 0.96 (0.89-1.04) | 0.29   |
| ED visit for psychiatric problems within the past 6-months    | 1.22 (0.90-1.65) | 0.2    |
| Hospitalization for psychiatric problems within past 6-months | 2.05 (1.50-2.80) | <0.001 |
| Suicide attempt in past week                                  | 1.44 (1.11-1.88) | 0.01   |
| Current alcohol misuse                                        | 1.29 (1.01-1.65) | 0.05   |
| Current drug use                                              | 0.87 (0.68-1.11) | 0.26   |

|                                                                   |                  |      |
|-------------------------------------------------------------------|------------------|------|
| Psychological distress (Global Severity Index score) <sup>¶</sup> | 1.00 (0.98-1.02) | 0.98 |
| Quality of life (SF-6D score) <sup>¶</sup>                        | 1.00 (0.95-1.05) | 0.98 |

Abbreviation: CI, confidence interval; ED, emergency department

\* None of the indicator variables for the participating sites were statistically significant (all  $P > 0.05$ )

† Defined by heart disease, cancer, HIV infection, diabetes, stroke, or chronic pain.

‡ Defined by depression, bipolar disorder, anxiety disorder, or schizophrenia.

§ Quadratic term included in the model based on likelihood ratio test.  $\beta$ -coefficient for the linear term, 0.19;  $\beta$ -coefficient for the quadratic term, -0.03.

**eTable 4.** Cox proportional hazards model for the suicide attempts including calendar month

| <b>Variables*</b>                                             | <b>Hazards ratio<br/>(95% CI)</b> | <b>P-value</b> |
|---------------------------------------------------------------|-----------------------------------|----------------|
| <i>Study phases</i>                                           |                                   |                |
| Phase 1 (Treatment as Usual)                                  | Reference                         | -              |
| Phase 2 (Universal Screening)                                 | 0.88 (0.65-1.18)                  | 0.39           |
| Phase 3 (Universal Screening + Intervention)                  | 0.70 (.52-.93)                    | 0.02           |
| <i>Covariates</i>                                             |                                   |                |
| Age categories (quartiles)                                    |                                   |                |
| 18-25.9 years                                                 | Reference                         | -              |
| 26-36.9 years                                                 | 1.11 (0.78-1.59)                  | 0.56           |
| 37-46.9 years                                                 | .99 (0.68-1.64)                   | 0.95           |
| ≥47 years                                                     | 1.15 (0.77-1.71)                  | 0.50           |
| Female sex                                                    | 1.05 (0.81-1.37)                  | 0.71           |
| Lives alone                                                   | 0.91 (0.69-1.21)                  | 0.53           |
| Served in the military                                        | 0.85 (0.51-1.44)                  | 0.55           |
| Coexisting medical disorder†                                  | 0.95 (0.72-1.25)                  | 0.74           |
| Coexisting psychiatric disorder‡                              | 2.31 (1.27-4.20)                  | 0.01           |
| Lifetime history of suicide attempt                           | 1.31 (0.89-1.90)                  | 0.15           |
| Lifetime history of aborted attempt                           | 1.02 (0.80-1.34)                  | 0.80           |
| Lifetime history of interrupted attempt                       | 1.15 (0.87-1.51)                  | 0.32           |
| Lifetime history of non-suicidal self-injury                  | 1.35 (1.04-1.75)                  | 0.02           |
| Columbia Suicide Severity Rating Scale (linear term)§         | 1.39 (0.93-2.07)                  | 0.11           |
| Columbia Suicide Severity Rating Scale (quadratic term)§      | 0.94 (0.87-1.02)                  | 0.12           |
| ED visit for psychiatric problems within the past 6-months    | 1.24 (0.90-1.71)                  | 0.19           |
| Hospitalization for psychiatric problems within past 6-months | 2.47 (1.78-3.44)                  | <0.001         |
| Suicide attempt in past week                                  | 1.38 (1.04-1.82)                  | 0.02           |
| Current alcohol misuse                                        | 1.44 (1.11-1.86)                  | 0.01           |
| Current drug use                                              | 1.01 (0.78-1.31)                  | 0.94           |
| Psychological distress (Global Severity Index score)¶         | 1.00 (0.98-1.02)                  | 0.89           |
| Quality of life (SF-6D score)¶                                | 1.00 (0.95-1.06)                  | 0.91           |
| Site 2                                                        | 0.83 (0.47-1.44)                  | 0.50           |
| Site 3                                                        | 1.19 (0.79-1.81)                  | 0.41           |
| Site 4                                                        | 0.77 (0.48-1.24)                  | 0.28           |
| Site 5                                                        | 1.13 (0.73-1.76)                  | 0.58           |
| Site 6                                                        | 0.67 (0.41-1.10)                  | 0.11           |
| Site 7                                                        | 0.94 (0.58-1.53)                  | 0.81           |



|                   |                  |      |
|-------------------|------------------|------|
| Site 8            | 0.85 (0.54-1.35) | 0.49 |
| Calendar Month 2  | 1.02 (0.55-1.87) | 0.96 |
| Calendar Month 3  | 1.26 (0.71-2.23) | 0.44 |
| Calendar Month 4  | 0.80 (0.42-1.50) | 0.48 |
| Calendar Month 5  | 0.95 (0.52-1.73) | 0.86 |
| Calendar Month 6  | 1.09 (0.61-1.96) | 0.77 |
| Calendar Month 7  | 1.55 (0.90-2.68) | 0.11 |
| Calendar Month 8  | 1.24 (0.70-2.21) | 0.46 |
| Calendar Month 9  | 1.04 (0.57-1.90) | 0.89 |
| Calendar Month 10 | 1.21 (0.68-2.15) | 0.52 |
| Calendar Month 11 | 0.85 (0.45-1.60) | 0.62 |
| Calendar Month 12 | 1.00 (0.55-1.84) | 0.99 |

Abbreviation: CI, confidence interval; ED, emergency department

\* None of the indicator variables for the participating sites were statistically significant (all  $P > 0.05$ )

† Defined by heart disease, cancer, HIV infection, diabetes, stroke, or chronic pain.

‡ Defined by depression, bipolar disorder, anxiety disorder, or schizophrenia.

§ Quadratic term included in the model based on likelihood ratio test.  $\beta$ -coefficient for the linear term, 0.30;  $\beta$ -coefficient for the quadratic term, -0.06.

¶ Hazard ratio for a one-unit increase in the corresponding scale.

**eTable 5.** Cox proportional hazards model for the effect of time on suicide attempts within each study phase

| <b>Variables*</b>                            | <b>Hazards ratio<br/>(95% CI)</b> | <b>P-value</b> |
|----------------------------------------------|-----------------------------------|----------------|
| <i>Study phases</i>                          |                                   |                |
| Phase 1 (Treatment as Usual)                 | 0.91 (0.69-1.22)                  | 0.54           |
| Phase 2 (Universal Screening)                | 0.98 (0.38-2.55)                  | 0.97           |
| Phase 3 (Universal Screening + Intervention) | 0.64 (0.26-1.58)                  | 0.33           |

**eTable 6.** Cox proportional hazards model for the suicide composite

| <b>Variables*</b>                                             | <b>Hazards ratio<br/>(95% CI)</b> | <b>P-value</b> |
|---------------------------------------------------------------|-----------------------------------|----------------|
| <i>Study phases</i>                                           |                                   |                |
| Phase 1 (Treatment as Usual)                                  | Reference                         | -              |
| Phase 2 (Universal Screening)                                 | 0.98 (0.81-1.20)                  | 0.74           |
| Phase 3 (Universal Screening + Intervention)                  | 0.78 (0.64-0.94)                  | 0.01           |
| <i>Covariates</i>                                             |                                   |                |
| <i>Age categories (quartiles)</i>                             |                                   |                |
| 18-25.9 years                                                 | Reference                         | -              |
| 26-36.9 years                                                 | 1.17 (0.91-1.50)                  | 0.05           |
| 37-46.9 years                                                 | 1.45 (1.13-1.87)                  | 0.004          |
| ≥47 years                                                     | 1.58 (1.21-2.07)                  | <0.001         |
| Female sex                                                    | 1.19 (1.00-1.42)                  | 0.07           |
| Lives alone                                                   | 0.96 (0.80-1.15)                  | 0.86           |
| Served in the military                                        | 0.95 (0.68-1.32)                  | 0.55           |
| Coexisting medical disorder†                                  | 1.22 (1.01-1.49)                  | 0.03           |
| Coexisting psychiatric disorder‡                              | 1.59 (1.15-2.20)                  | 0.002          |
| Lifetime history of suicide attempt                           | 1.42 (1.12-1.80)                  | 0.02           |
| Lifetime history of aborted attempt                           | 1.29 (1.08-1.54)                  | 0.002          |
| Lifetime history of interrupted attempt                       | 1.21 (1.01-1.45)                  | 0.18           |
| Lifetime history of non-suicidal self-injury                  | 1.33 (1.12-1.59)                  | <0.001         |
| Columbia Suicide Severity Rating Scale (linear term)§         | 1.04 (0.78-1.38)                  | 0.77           |
| Columbia Suicide Severity Rating Scale (quadratic term)§      | 0.99 (0.94-1.05)                  | 0.86           |
| ED visit for psychiatric problems within the past 6-months    | 1.11 (0.90-1.38)                  | 0.44           |
| Hospitalization for psychiatric problems within past 6-months | 1.56 (1.24-1.97)                  | <0.001         |
| Suicide attempt in past week                                  | 0.95 (0.79-1.15)                  | 0.45           |
| Current alcohol misuse                                        | 1.02 (0.86-1.22)                  | 0.90           |
| Current drug use                                              | 1.06 (0.89-1.26)                  | 0.44           |
| Psychological distress (Global Severity Index score)¶         | 1.00 (0.99-1.02)                  | 0.66           |
| Quality of life (SF-6D score)¶                                | 0.98 (0.95-1.02)                  | 0.29           |

Abbreviation: CI, confidence interval; ED, emergency department

\* None of the indicator variables for the participating sites were statistically significant (all  $P > 0.05$ )

† Defined by heart disease, cancer, HIV infection, diabetes, stroke, or chronic pain.

‡ Defined by depression, bipolar disorder, anxiety disorder, or schizophrenia.

§ Quadratic term included in the model based on likelihood ratio test.  $\beta$ -coefficient for the linear term, 0.82;  $\beta$ -coefficient for the quadratic term, 0.79.

**eTable 7.** Negative binomial regression model for the suicide composite as a count variable

| <b>Variables*</b>                                             | <b>Risk ratio<br/>(95% CI)</b> | <b>P-value</b> |
|---------------------------------------------------------------|--------------------------------|----------------|
| <i>Study phases</i>                                           |                                |                |
| Phase 1 (Treatment as Usual)                                  | Reference                      | -              |
| Phase 2 (Screening Only)                                      | 0.97 (0.81-1.16)               | 0.74           |
| Phase 3 (Intervention)                                        | 0.78 (0.65-0.93)               | 0.01           |
| <i>Covariates</i>                                             |                                |                |
| Age categories (quartiles)                                    |                                |                |
| 18-25.9 years                                                 | Reference                      | -              |
| 26-36.9 years                                                 | 1.26 (1.00-1.58)               | 0.05           |
| 37-46.9 years                                                 | 1.41 (1.12-1.78)               | 0.004          |
| ≥47 years                                                     | 1.60 (1.25-2.04)               | <0.001         |
| Female sex                                                    | 1.16 (0.99-1.37)               | 0.07           |
| Lives alone                                                   | 0.99 (0.83-1.16)               | 0.86           |
| Served in the military                                        | 0.91 (0.67-1.24)               | 0.55           |
| Coexisting medical disorder†                                  | 1.22 (1.02-1.46)               | 0.03           |
| Coexisting psychiatric disorder‡                              | 1.67 (1.22-2.29)               | 0.002          |
| Lifetime history of suicide attempt                           | 1.30 (1.05-1.62)               | 0.02           |
| Lifetime history of aborted attempt                           | 1.30 (1.10-1.53)               | 0.002          |
| Lifetime history of interrupted attempt                       | 1.12 (0.95-1.32)               | 0.18           |
| Lifetime history of non-suicidal self-injury                  | 1.32 (1.13-1.55)               | <0.001         |
| Columbia Suicide Severity Rating Scale (linear term)§         | 1.04 (0.80-1.34)               | 0.77           |
| Columbia Suicide Severity Rating Scale (quadratic term)§      | 1.00 (0.95-1.05)               | 0.86           |
| ED visit for psychiatric problems within the past 6-months    | 1.08 (0.89-1.30)               | 0.44           |
| Hospitalization for psychiatric problems within past 6-months | 1.41 (1.15-1.73)               | <0.001         |
| Suicide attempt in past week                                  | 1.07 (0.90-1.27)               | 0.45           |
| Current alcohol misuse                                        | 1.01 (0.86-1.19)               | 0.90           |
| Current drug use                                              | 0.94 (0.81-1.10)               | 0.44           |
| Psychological distress (Global Severity Index score)¶         | 1.00 (0.99-1.02)               | 0.66           |
| Quality of life (SF-6D score)¶                                | 0.98 (0.95-1.02)               | 0.29           |

Abbreviation: ED, emergency department

\* None of the indicator variables for the participating sites were statistically significant (all P>0.05)

† Defined by heart disease, cancer, HIV infection, diabetes, stroke, or chronic pain.

‡ Defined by depression, bipolar disorder, anxiety disorder, or schizophrenia.

§ Quadratic term included in the model based on likelihood ratio test.  $\beta$ -coefficient for the linear term, 0.07;  $\beta$ -coefficient for the quadratic term, -0.01.  
¶ Hazard ratio for a one-unit increase in the corresponding scale.

**eFigure.** Proportion of participants who remained suicide composite-free over time

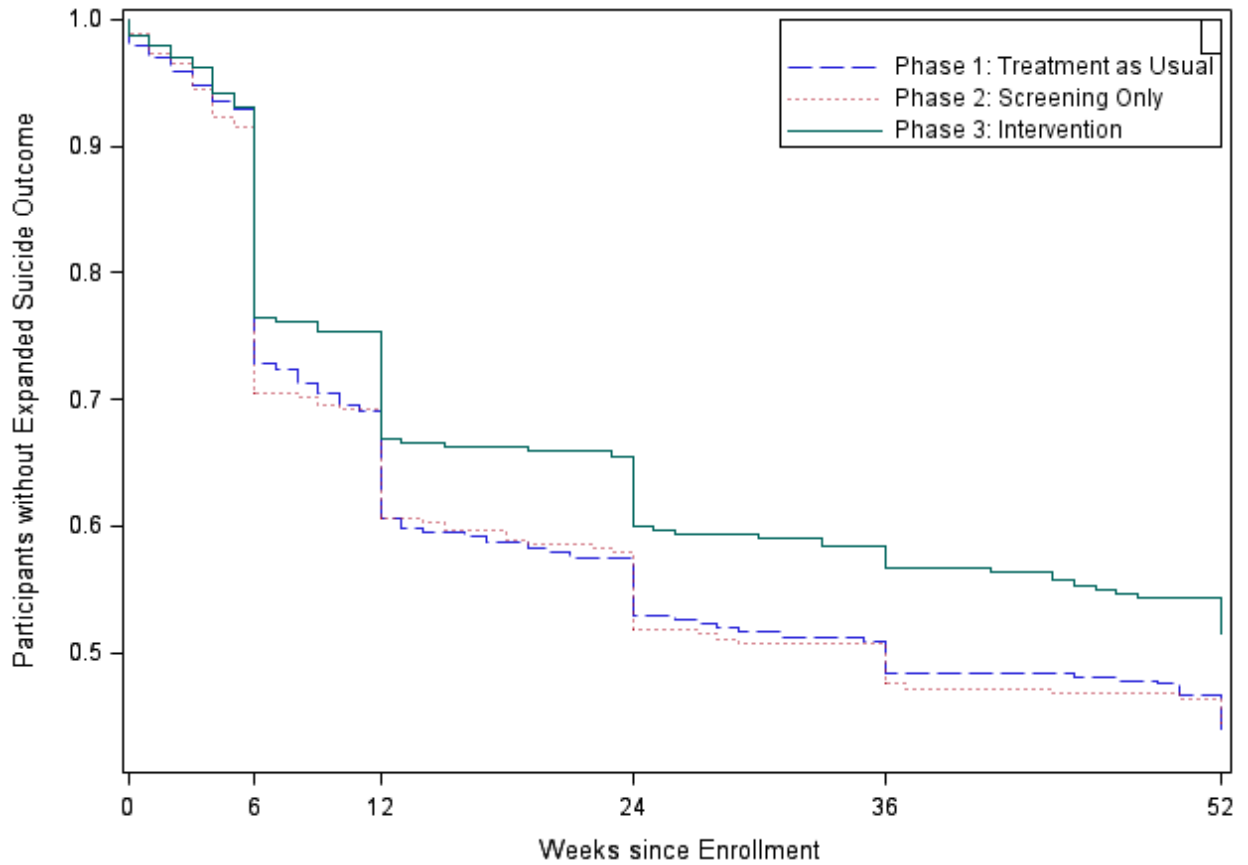

Number of Participants at Risk

|         |     |     |     |  |     |  |     |  |     |
|---------|-----|-----|-----|--|-----|--|-----|--|-----|
| Phase 1 | 497 | 462 | 271 |  | 215 |  | 183 |  | 158 |
| Phase 2 | 377 | 345 | 209 |  | 171 |  | 143 |  | 123 |
| Phase 3 | 502 | 466 | 282 |  | 238 |  | 200 |  | 180 |

The Universal Screening phase (Phase 2) vs. the Treatment as Usual phase (Phase 1):  $P=0.91$  by log-rank test. The Universal Screening + Intervention phase (Phase 3) vs. the Treatment as Usual phase (Phase 1):  $P=0.03$  by log-rank test.
